# Supplementary material for: Effective denitrification process by a low voltage in a multi-cathode bio-electrode film reactor
Source: Royal Society of Chemistry journal article supplement (doi:10.1039/c4ra15792c), 2015-01-01
Supplement: c4ra15792c1.pdf [file c4ra15792c1.pdf]

## Electronic Supplementary Information

# Effective denitrification process by a low voltage in a multi-cathode bio-electrode film reactor

Ruqiong Cao<sup>a</sup>, Diwen Ying<sup>b</sup>, Chenjun Li<sup>a</sup>, Yalin Wang<sup>a</sup> and Jinping Jia<sup>\*a</sup>

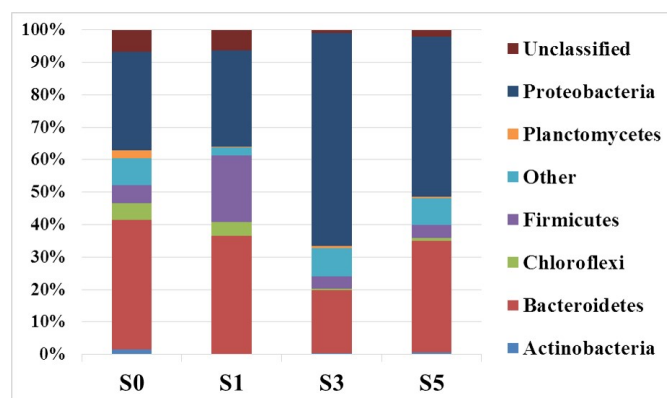

**Fig. S1** Taxonomic classification of the dominant phylogenetic groups from cathode biofilm of S0 (inoculum), S1 (applied voltage of 0 V), S3 (0.25 V) and S5 (0.5 V) at the phylum level.

## Notes and references

<sup>a</sup> School of Environmental Science and Engineering, Shanghai Jiao Tong University, 800 Dongchuan Road, Shanghai, 200240, P. R. China.

<sup>b</sup> School of Material Science and Engineering, Shanghai Jiao Tong University, 800 Dongchuan Road, Shanghai, 200240, P. R. China.

\* Corresponding author. E-mail address: [jjia@sjtu.edu.cn](mailto:jjia@sjtu.edu.cn); Tel.: +86 (021) 5474-2817; fax: +86 (021) 5474-2817.
